# Supplementary figures and images for: Microwave-assisted synthesis of poly(ionic liquid)-coated magnetic nanoparticles for the extraction of sulfonylurea herbicides from soil for HPLC
Source: Royal Society of Chemistry journal article supplement (doi:10.1039/c4ay02830a), 2015-01-01

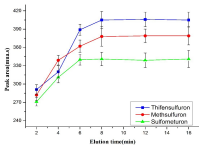

Supplement: c4ay02830a4.pdf [file c4ay02830a4.pdf]

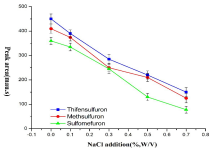

Supplement: c4ay02830a5.pdf [file c4ay02830a5.pdf]
